# Supplementary material
Source: PubMed Central journal article supplement (PMC4649660)
Supplement: supp_115.181602_FigureS1.pdf [file supp_115.181602_FigureS1.pdf]

**A**

| Sequence of Linker Oligonucleotides |                                            |                                     |
|-------------------------------------|--------------------------------------------|-------------------------------------|
| Number                              | Sequence                                   | Description                         |
| HL1870                              | GTAATACGACTCACTATAGGGCTCCGCTTAAGGGAC       | Linker oligonucleotide              |
| HL1871                              | 5' P- TAGTCCCTTAAGCGGAG-NH <sub>3</sub> 3' | Amino tailed linker oligonucleotide |

**B**

| Sequence of Illumina Sequence Primers |                                                                                                       |                                                                     |
|---------------------------------------|-------------------------------------------------------------------------------------------------------|---------------------------------------------------------------------|
| Number                                | Sequence                                                                                              | Description                                                         |
| HL3498                                | AATGATACGGCGACCACCGAGATCTACACTCTTTCCCTACACGACGCTCT<br>TCCGATCT <b>ACGT</b> CTCACCGCAGTTGATGCATAGGAAGC | Tf1-LTR primers with barcodes ( <i>sap1</i> <sup>+</sup> (25°C) #1) |
| HL3512                                | AATGATACGGCGACCACCGAGATCTACACTCTTTCCCTACACGACGCTCT<br>TCCGATCT <b>TGCA</b> CTCACCGCAGTTGATGCATAGGAAGC | Tf1-LTR primers with barcodes ( <i>sap1</i> <sup>+</sup> (25°C) #2) |
| HL3513                                | AATGATACGGCGACCACCGAGATCTACACTCTTTCCCTACACGACGCTCT<br>TCCGATCT <b>GTAC</b> CTCACCGCAGTTGATGCATAGGAAGC | Tf1-LTR primers with barcodes ( <i>sap1</i> <sup>+</sup> (25°C) #3) |
| HL3514                                | AATGATACGGCGACCACCGAGATCTACACTCTTTCCCTACACGACGCTCT<br>TCCGATCT <b>CATG</b> CTCACCGCAGTTGATGCATAGGAAGC | Tf1-LTR primers with barcodes ( <i>sap1-1</i> (25°C) #1)            |
| HL3520                                | AATGATACGGCGACCACCGAGATCTACACTCTTTCCCTACACGACGCTCT<br>TCCGATCT <b>AGTC</b> CTCACCGCAGTTGATGCATAGGAAGC | Tf1-LTR primers with barcodes ( <i>sap1-1</i> (25°C) #2)            |
| HL3521                                | AATGATACGGCGACCACCGAGATCTACACTCTTTCCCTACACGACGCTCT<br>TCCGATCT <b>GACT</b> CTCACCGCAGTTGATGCATAGGAAGC | Tf1-LTR primers with barcodes ( <i>sap1-1</i> (25°C) #3)            |

**C**

| Sequence of PCR Primer |                                                              |                                       |
|------------------------|--------------------------------------------------------------|---------------------------------------|
| Number                 | Sequence                                                     | Description                           |
| HL2216                 | CAAGCAGAAGACGGCATACGAGCTCTTCCGATCTGTAATACGACTCACTA<br>TAGGGC | PCR primer that anneals to linker end |

Figure S1. Sequences of primers/oligonucleotides used in the generation of Tf1 serial number data in *sap1*<sup>+</sup> and *sap1-1* cells. A. The sequence of amplification primers that annealed to the LTR upstream of the serial numbers are shown. The nucleotides highlighted in red signify six different barcodes: *sap1*<sup>+</sup> (25°C) #1: AGCT, *sap1*<sup>+</sup> (25°C) #2: TGCA, *sap1*<sup>+</sup> (25°C) #3: GTAC, *sap1-1* (25°C) #1: CATG, *sap1-1* (25°C) #2: AGTC, and *sap1-1* (25°C) #3: GACT. B and C. The sequences of (B) the oligonucleotides that comprised the ligation linker (HL1870 and HL1871) and of (C) the amplification primer (HL2216) are shown. Serial numbers were created and amplified using methods previously described (Chatterjee *et al.* 2014).
