# Supplementary material
Source: PubMed Central journal article supplement (PMC4649660)
Supplement: supp_115.181602_FigureS2.pdf [file supp_115.181602_FigureS2.pdf]

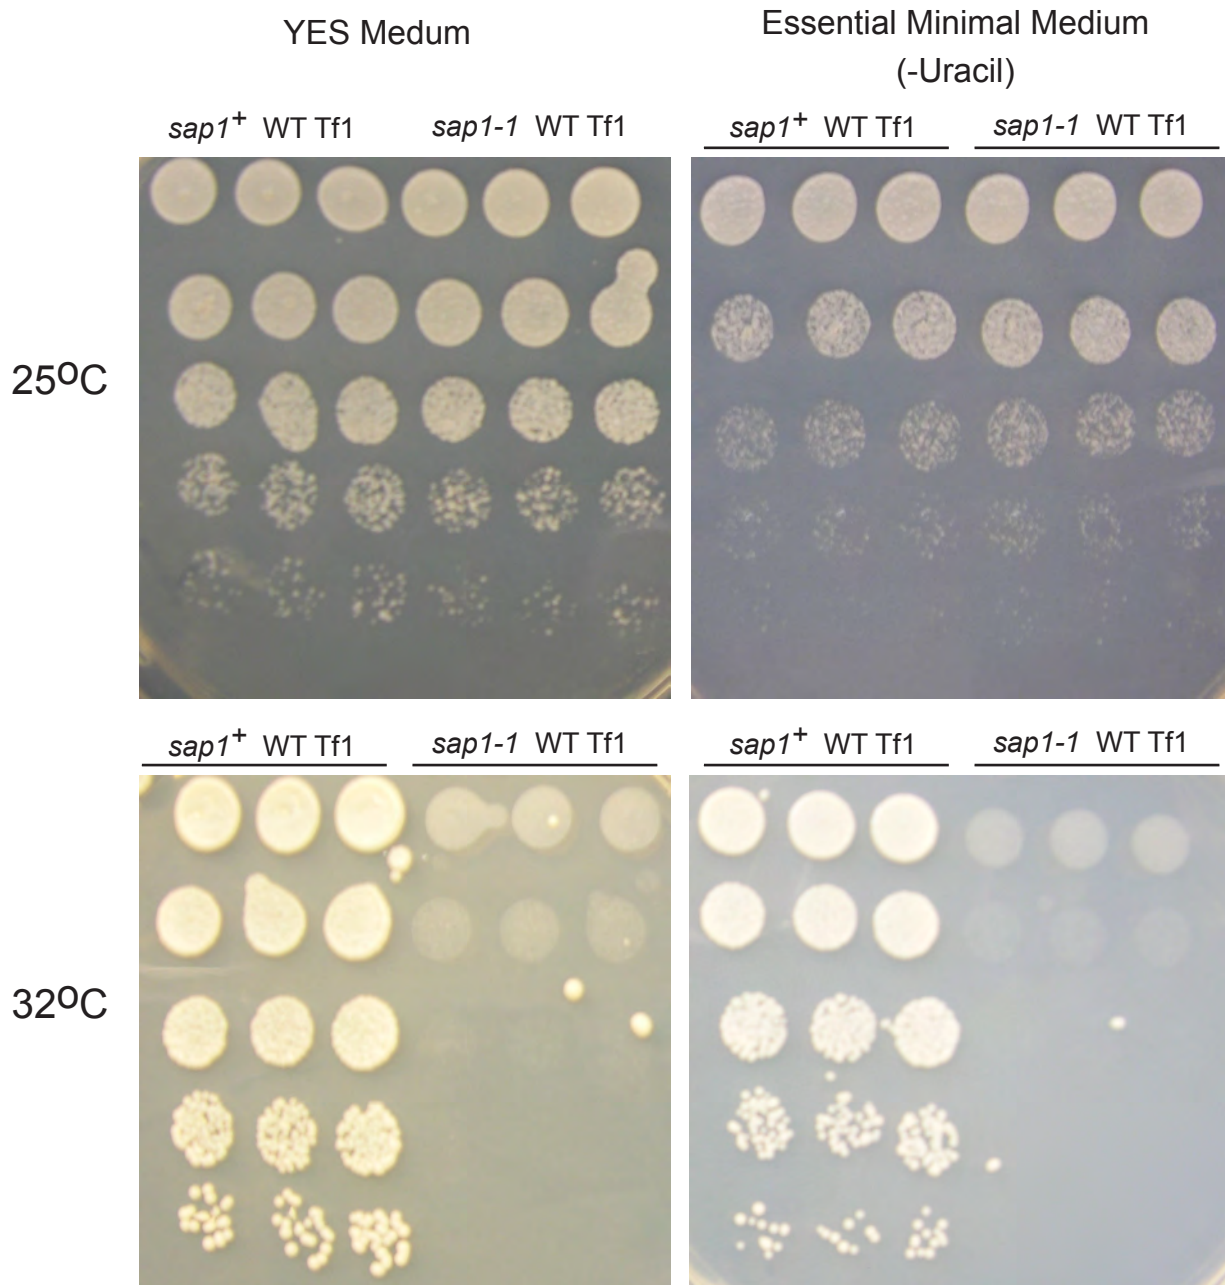

Figure S2. The *sap1-1* mutation causes no apparent growth defect at 25°C. Five fold serial dilutions of *sap*<sup>+</sup> and *sap1-1* *S. pombe* transformed with plasmids expressing WT Tf1 were spotted onto both solid YES and EMM –uracil media, and were grown at the indicated temperatures for 5 days. Three independent transformants from each genotype were assessed. The serial dilutions were prepared from resuspensions of plate grown yeast in liquid EMM-uracil at a starting O.D.600 of 0.500.
