# Supplementary material
Source: PubMed Central journal article supplement (PMC4649660)
Supplement: supp_115.181602_FigureS3.pdf [file supp_115.181602_FigureS3.pdf]

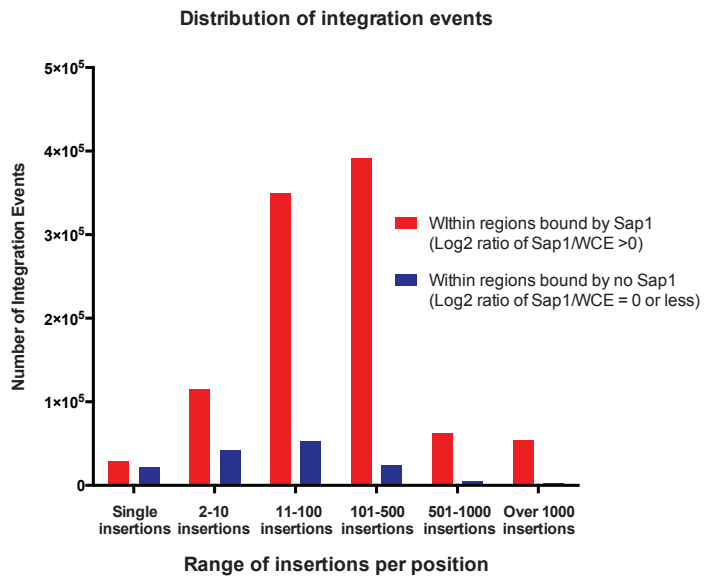

Figure S3. The majority of Tf1 integration occur in regions of the genome that are bound by Sap1. Graph showing the number of Tf1 insertions that occur within the indicated ranges of insertions per positions, as well as their occurrence in- and outside Sap1-binding regions in the genome.
