# Supplementary material
Source: PubMed Central journal article supplement (PMC4649660)
Supplement: supp_115.181602_FigureS4.pdf [file supp_115.181602_FigureS4.pdf]

**A**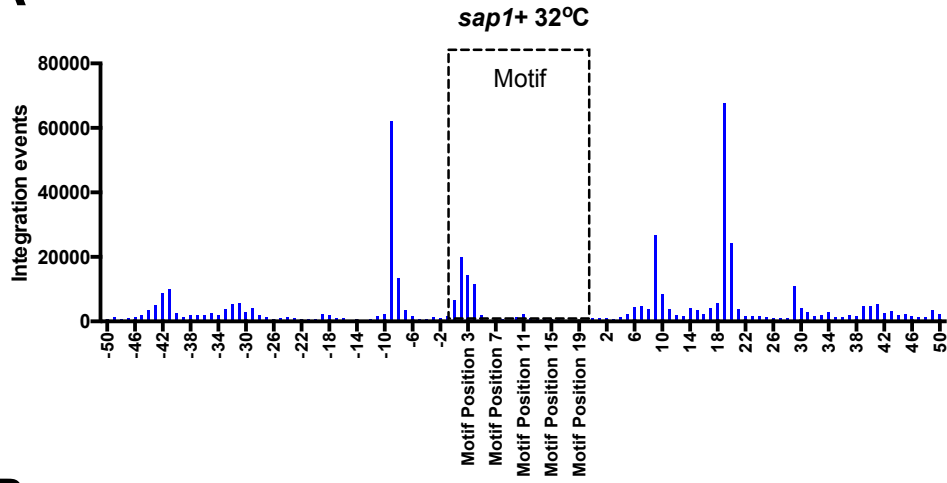**B**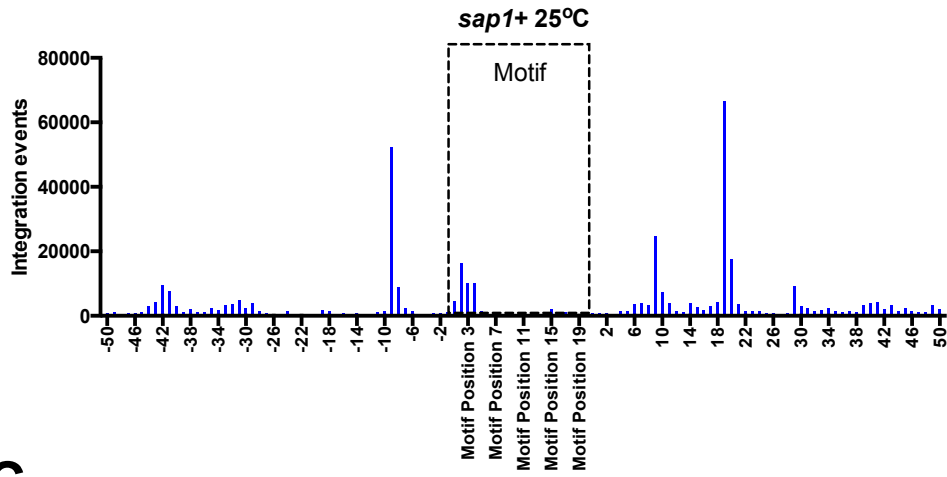**C**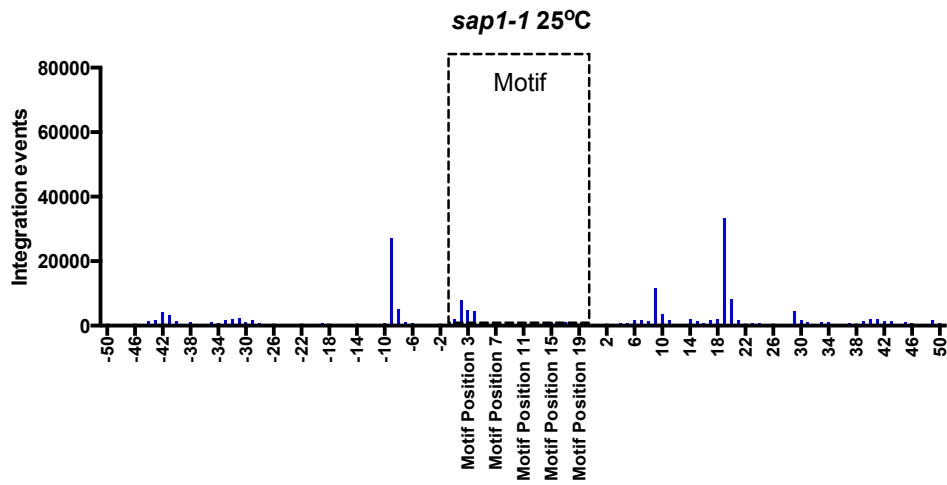

Nucleotide Position relative to Motif

Figure S4. The pattern of Tf1 insertions at specific nucleotide positions near Sap1 binding motifs is not altered in *sap1-1* yeast. A. Graph showing the alignment of ~5000 genomic Sap1 motifs that were identified using FIMO of MEME Suite. The tabulated number of Tf1 insertions that occur at single nucleotide positions within 50bp of the aligned motifs in *sap1+* cells grown at 32°C are plotted on the Y-axis. B and C. Same graph as in A generated from data collected from B) *sap1+* cells grown at 25°C and C) *sap1-1* cells grown at 25°C.
