# Supplementary material
Source: PubMed Central journal article supplement (PMC4649660)
Supplement: supp_115.181602_FigureS5.pdf [file supp_115.181602_FigureS5.pdf]

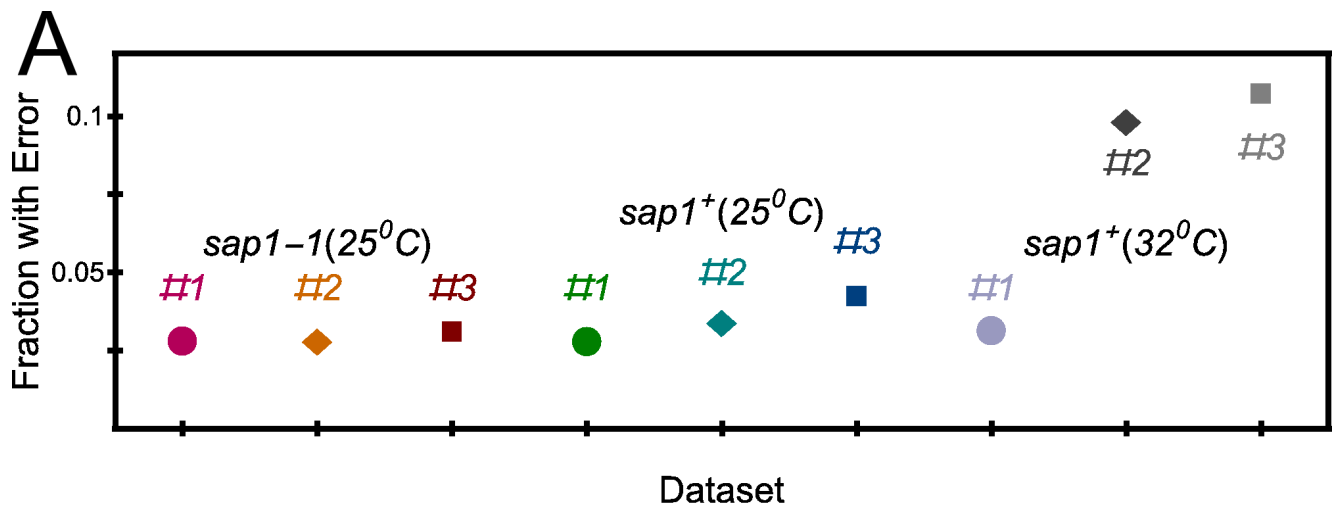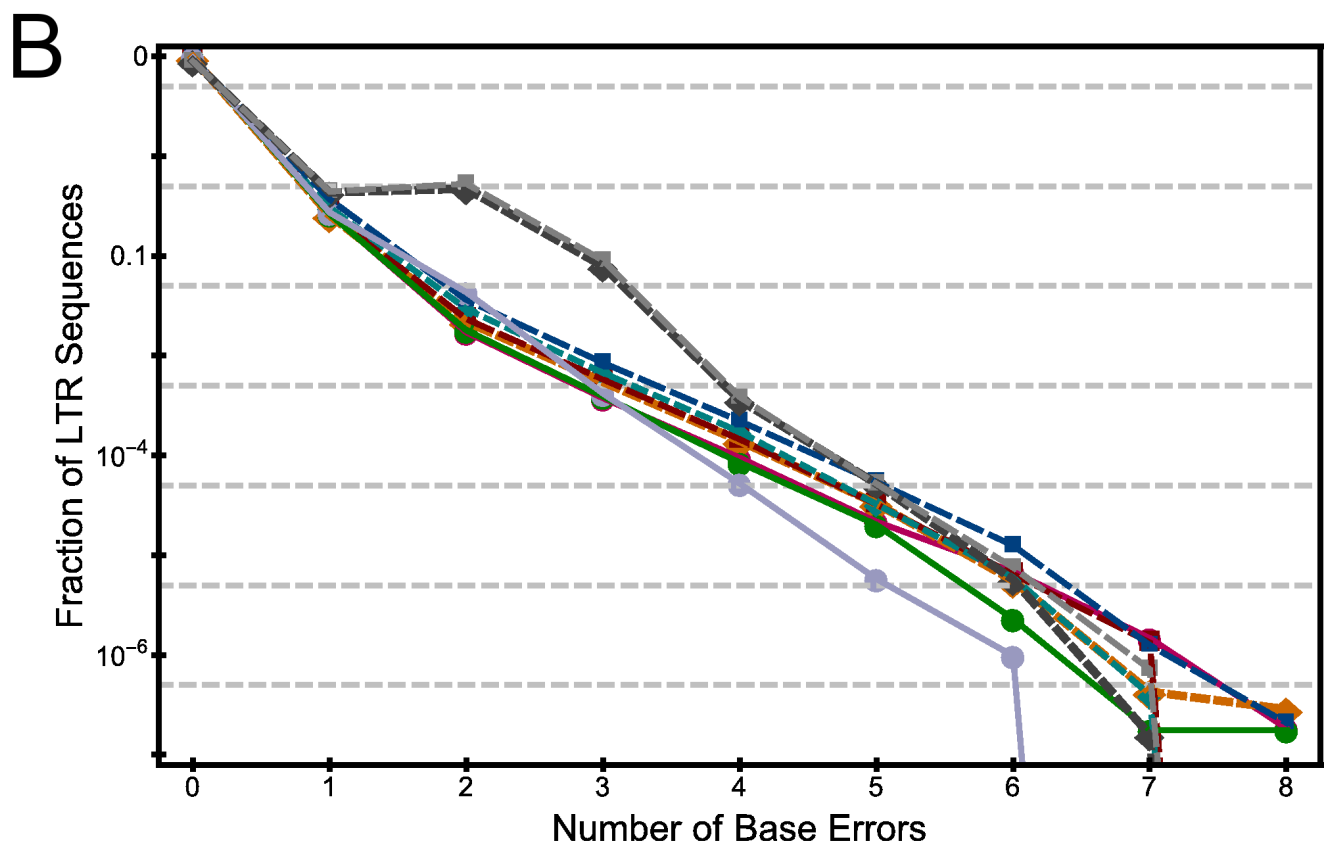

**Figure S5.** Error rate in reading the eight base pair serial number sequence. (A) Fraction of eight base pair sequences mis-read for each of the nine datasets. (B). Proportion of serial sequence reads with a given number of base mis-matches for each of the nine datasets. The symbols and colors for each data-base match those in (A). The dashed gray lines show fraction =  $5 \times 10^{-n}$ ,  $n = 1, 2, 3, 4, 5, 6$ .
