# Supplementary material
Source: PubMed Central journal article supplement (PMC4649660)
Supplement: supp_115.181602_FigureS6.pdf [file supp_115.181602_FigureS6.pdf]

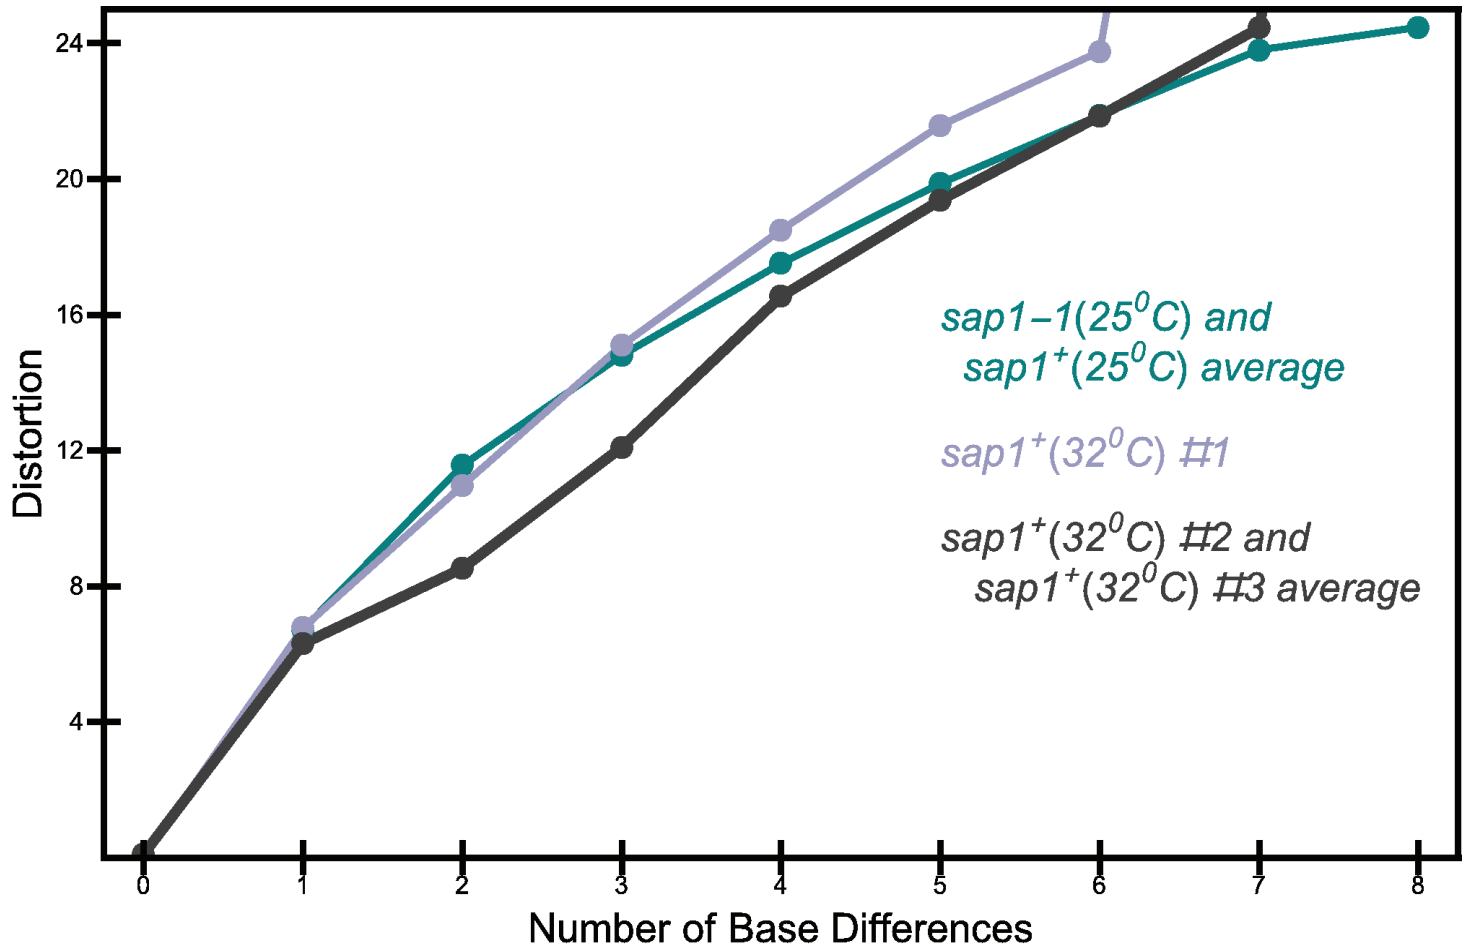

**Figure S6.** The distortion function between two serial numbers as a function of the number of base differences between them.
