# Supplementary material
Source: PubMed Central journal article supplement (PMC4649660)
Supplement: supp_115.181602_FigureS8.pdf [file supp_115.181602_FigureS8.pdf]

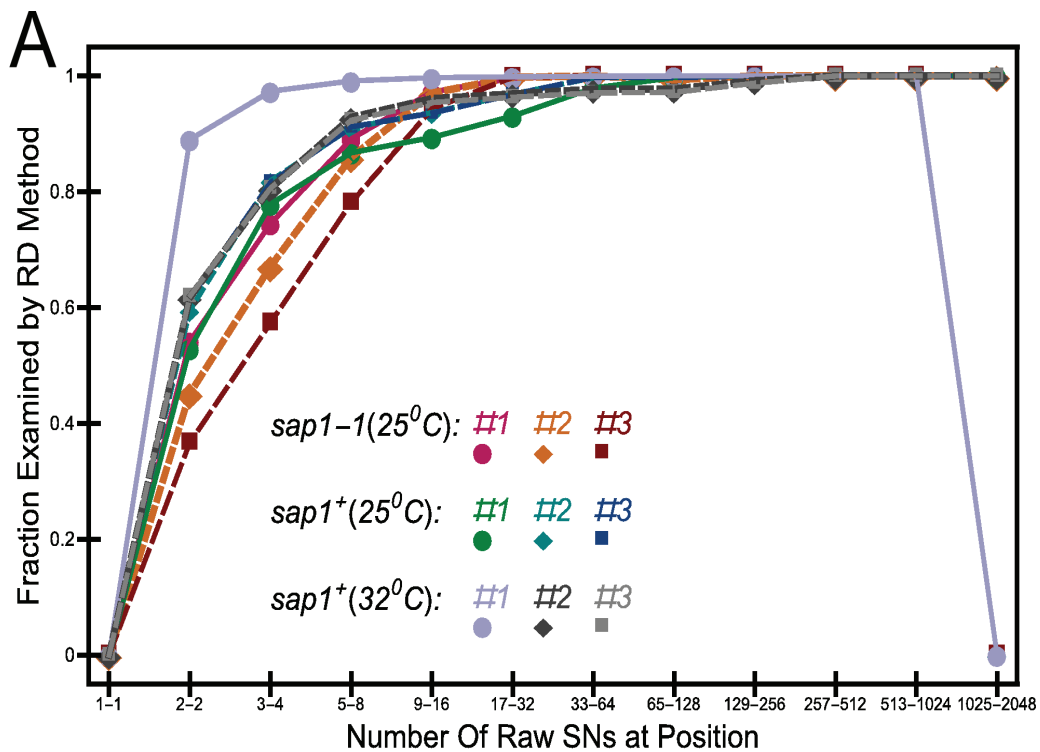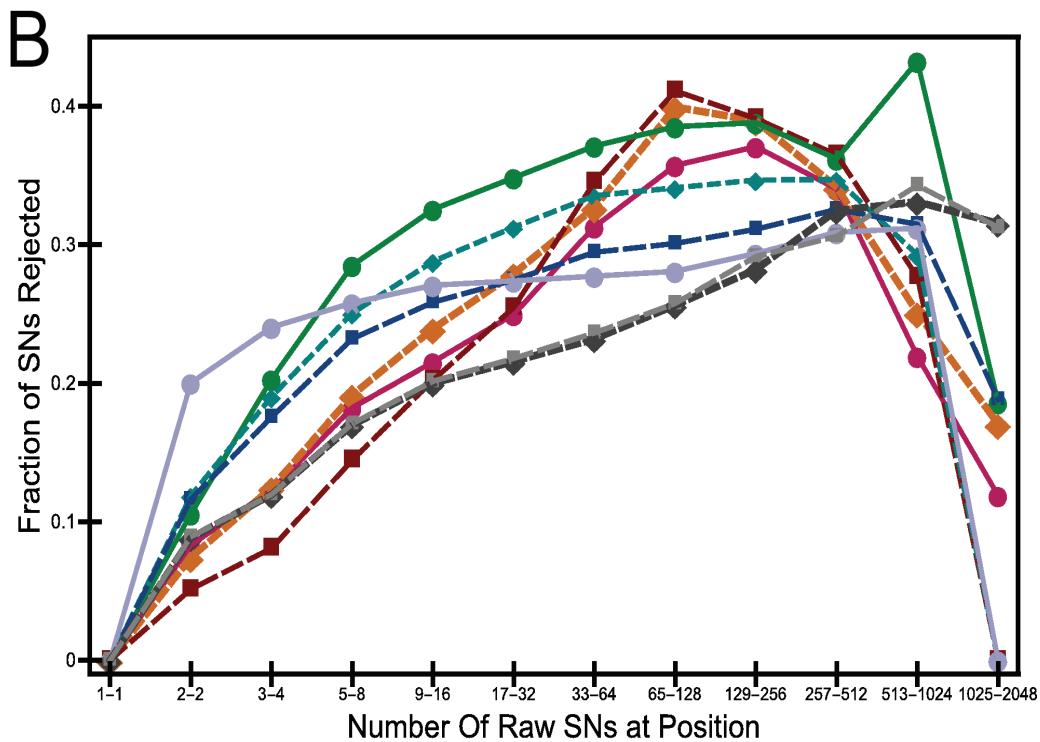

**Figure S8.** (A) Proportion of positions that could be analyzed by the rate distortion method versus the number of raw serial numbers at the position. (B) Average proportion of serial numbers judged as not real at a position by the rate distortion method versus the number of raw serial numbers at the position. The symbols and colors for each database match those in (A).
