# Supplementary material
Source: PubMed Central journal article supplement (PMC4649660)
Supplement: supp_115.181602_TableS2.pdf [file supp_115.181602_TableS2.pdf]

Table S2. Tf1 insertion numbers relative to genomic regions of Sap1 binding ( $\text{Log}_2$  Ratio of Sap1/WCE > 0)

|                                   | Number of nucleotide positions | Percentage of genome | Number of Tf1 integrations | Percentage of Tf1 Integrations |
|-----------------------------------|--------------------------------|----------------------|----------------------------|--------------------------------|
| Within regions of Sap1 binding    | 3,543,717                      | 28.15                | 1,002,276                  | 87.08                          |
| Within regions of No Sap1 binding | 9,047,538                      | 71.85                | 148,716                    | 12.92                          |
| Total                             | 12,591,255                     | 100                  | 1,150,992                  | 100                            |
